# Supplementary material
Source: MDPI journal article supplement (https://www.mdpi.com/2311-7524/9/10/1119)
Supplement: s1 [file s1]

Archive with 15 entries (15 files):
- Supplementary Figure S1.png
- Supplementary Figure S2.jpg
- Supplementary Figure S3.jpg
- Supplementary Figure S4.jpg
- Supplementary Figure S5.jpg
- Supplementary Table S1.pdf
- Supplementary Table S10.xlsx
- Supplementary Table S2.xlsx
- Supplementary Table S3-.pdf
- Supplementary Table S4-.pdf
- Supplementary Table S5.pdf
- Supplementary Table S6-.pdf
- Supplementary Table S7.xlsx
- Supplementary Table S8.xlsx
- Supplementary Table S9.xlsx
