# Supplementary material
Source: MDPI journal article supplement (https://www.mdpi.com/2311-7524/9/10/1119)
Supplement: s1 [file s1 › Supplementary Table S1.pdf]

**Table S1.** The specific primers of all *BoMAPK* genes used in RT-qPCR analysis

| Gene name         | Forward primer            | Reverse primer           |
|-------------------|---------------------------|--------------------------|
| <i>BoMAPK1</i>    | TCAGCCAACATACTCCACCG      | TTGTCGCAGCAGAGGAGAAG     |
| <i>BoMAPK2</i>    | TGCCAATACTTCTTGTTCCAGC    | CATCCCACCGACCAGACATC     |
| <i>BoMAPK3</i>    | GCCTTTGTTCCCTGGCAAAG      | ATCATTCGGGTCGTGCAACT     |
| <i>BoMAPK4.1</i>  | GCACGAAAGGATTGGCTACTC     | CTTGGCGTCGATGATGTTGT     |
| <i>BoMAPK4.2</i>  | AGGTGCCTATGGTATTGTCTGCT   | CTGGTGGCTCGATTATATCTTTCA |
| <i>BoMAPK5</i>    | AACAAAGTAGATGCTAAGCGAACG  | CAAGGGCTGATCTGAACGAATA   |
| <i>BoMAPK6.1</i>  | TAGCCACGGAGGGAAGTTTATT    | GCCGAACAGACGATGCCAT      |
| <i>BoMAPK6.2</i>  | GCATCGTTTGCTCGGCTATG      | TGAAAGCGGTTCTTAGCGGT     |
| <i>BoMAPK7</i>    | CAAACAGCAAGGGAAACATTACTAC | TGATGGAAGAACAAACCACACC   |
| <i>BoMAPK8.1</i>  | TCTAGACACACACACTGGCG      | GACGAAGCAACCTCAGCAAC     |
| <i>BoMAPK8.2</i>  | CCTTCTTGAACGCCTGCTTG      | ATGGTTCGCGCTCTGAGTTT     |
| <i>BoMAPK9</i>    | CGAGCTCATGGAGTCAGACC      | CACAAAGTTCTGGTGCACGG     |
| <i>BoMAPK13</i>   | GTCCCTCCTATCCGTCCCAT      | ATCTCTTTGCGGTGGTCTTACA   |
| <i>BoMAPK15</i>   | TGTGACTTTGGGCTTGCTCG      | TGCTTCTGGAGGTGGAGTGC     |
| <i>BoMAPK16.1</i> | TCTCCACCAGGTTATCAAGGCT    | TCTCGCAAGTCCAAAATCACAG   |
| <i>BoMAPK17.1</i> | ATATCGATCCTGTGGCGCTG      | TCCCTCACATCATCCCGAGT     |
| <i>BoMAPK17.2</i> | TCTCCTTCACTGATTCCCCTTC    | AATGGCTTTCCGGTTAGCAT     |
| <i>BoMAPK18.1</i> | CACACGGGAGAGAAAGTCGC      | CATCGTTCGCCTTAATAACCTG   |
| <i>BoMAPK18.2</i> | CGACCTCCAATGCTCAACCT      | AAGGCGCTTCTCTTGGTTCA     |
| <i>BoMAPK19.1</i> | TCCTCCTTCCAAGCGAGAGT      | GCGCGAAGCATCTGGTAAAG     |
| <i>BoMAPK19.2</i> | AAGACGATAGGGTTGTTGAGCG    | CGTAGCTTCCTTTCCCGATGA    |
| <i>BoMAPK20.1</i> | GCGCCTTTTGACAACGGTAG      | GTTCTCCGCCTTGTGCATTC     |
| <i>BoMAPK20.2</i> | AAGCCACCCATTCTTTTACTC     | TTGAGCAGTTGGACGGTCTTT    |
| <i>Actin</i>      | CGTGACCTTACTGACTACC       | CTCCATCTCCTGCTCGTA       |
