# Supplementary material
Source: MDPI journal article supplement (https://www.mdpi.com/2311-7524/9/10/1119)
Supplement: s1 [file s1 › Supplementary Table S2.xlsx]

## Sheet: Sheet1
Table S2. List of MAPK genes identified in B. oleracea and A. thaliana.
Bol. ID	Ath. ID	sequence similarity (%)	Compare effective length	Mismatch number	e-value
BoMAPK1 (BolC05g008000.2J)	AtMAPK1	95.88	364	15	0
BoMAPK2 (BolC01g035020.2J)	AtMAPK2	94.59	370	18	0
BoMAPK3 (BolC03g065400.2J)	AtMAPK3	94.31	369	21	0
BoMAPK4.1 (BolC03g035260.2J)	AtMAPK4	95.71	373	16	0
BoMAPK4.2 (BolC08g057380.2J)	AtMAPK4	74.02	358	93	1e-162
BoMAPK5 (BolC09g032170.2J)	AtMAPK5	90.67	375	32	0
BoMAPK6.1 (BolC04g005090.2J)	AtMAPK6	95.19	395	14	0
BoMAPK6.2 (BolC03g026650.2J)	AtMAPK6	90.8	413	16	0
BoMAPK7 (BolC09g012900.2J)	AtMAPK7	96.73	367	12	0
BoMAPK8.1 (BolC08g051030.2J)	AtMAPK8	90.71	592	42	0
BoMAPK8.2 (BolC05g015790.2J)	AtMAPK8	89.64	589	52	0
BoMAPK9 (BolC05g047830.2J)	AtMAPK9	92.08	505	31	0
BoMAPK13 (BolC04g067890.2J)	AtMAPK13	94.89	372	19	0
BoMAPK15 (BolC06g032120.2J)	AtMAPK15	88.53	584	49	0
BoMAPK16.1 (BolC09g053590.2J)	AtMAPK16	93.42	562	26	0
BoMAPK16.2 (BolC03g009910.2J)	AtMAPK16	92.46	570	29	0
BoMAPK17.1 (BolC07g031210.2J)	AtMAPK17	96.3	487	17	0
BoMAPK17.2 (BolC02g049250.2J)	AtMAPK17	95.49	488	20	0
BoMAPK18.1 (BolC06g008540.2J)	AtMAPK18	86.18	608	67	0
BoMAPK18.2 (BolC05g051570.2J)	AtMAPK18	76.32	625	102	0
BoMAPK19.1 (BolC06g014820.2J)	AtMAPK19	84.68	594	58	0
BoMAPK19.2 (BolC01g048030.2J)	AtMAPK19	78.21	624	99	0
BoMAPK20.1 (BolC04g004430.2J)	AtMAPK20	94.89	607	24	0
BoMAPK20.2 (BolC03g026050.2J)	AtMAPK20	89.08	595	32	0
