# Supplementary material
Source: MDPI journal article supplement (https://www.mdpi.com/2311-7524/9/10/1119)
Supplement: s1 [file s1 › Supplementary Table S3-.pdf]

**Table S3.** Size of the MAPK subgroups in different plant species

| <b>Species</b>              | <b>A</b> | <b>B</b> | <b>C</b> | <b>D</b> |
|-----------------------------|----------|----------|----------|----------|
| <i>Brassica oleracea</i>    | 3        | 4        | 3        | 14       |
| <i>Brassica napus</i>       | 3        | 4        | 5        | 17       |
| <i>Brassica rapa</i>        | 2        | 4        | 2        | 6        |
| <i>Arabidopsis thaliana</i> | 3        | 5        | 4        | 8        |
| <i>Oryza sativa</i>         | 2        | 2        | 2        | 11       |
