# Supplementary material
Source: MDPI journal article supplement (https://www.mdpi.com/2311-7524/9/10/1119)
Supplement: s1 [file s1 › Supplementary Table S4-.pdf]

**Table S4.** Secondary structural elements of BoMAPK proteins

| <b>Gene name</b> | <b>Alpha Helix (%)</b> | <b>Extended Strand (%)</b> | <b>Beta Turn (%)</b> | <b>Random Coil (%)</b> |
|------------------|------------------------|----------------------------|----------------------|------------------------|
| BoMAPK1          | 41.19%                 | 15.99%                     | 6.78%                | 36.04%                 |
| BoMAPK2          | 47.03%                 | 13.24%                     | 6.22%                | 33.51%                 |
| BoMAPK3          | 43.51%                 | 12.97%                     | 5.41%                | 38.11%                 |
| BoMAPK4.1        | 42.63%                 | 14.48%                     | 5.63%                | 37.27%                 |
| BoMAPK4.2        | 44.74%                 | 13.75%                     | 6.47%                | 35.04%                 |
| BoMAPK5          | 43.70%                 | 12.87%                     | 5.36%                | 38.07%                 |
| BoMAPK6.1        | 42.86%                 | 13.78%                     | 6.38%                | 36.99%                 |
| BoMAPK6.2        | 43.24%                 | 12.80%                     | 5.07%                | 38.89%                 |
| BoMAPK7          | 45.92%                 | 14.95%                     | 7.07%                | 32.07%                 |
| BoMAPK8.1        | 44.33%                 | 10.82%                     | 4.98%                | 39.86%                 |
| BoMAPK8.2        | 43.32%                 | 13.01%                     | 4.45%                | 39.21%                 |
| BoMAPK9          | 46.11%                 | 11.38%                     | 4.39%                | 38.12%                 |
| BoMAPK13         | 43.28%                 | 15.05%                     | 5.65%                | 36.02%                 |
| BoMAPK15         | 44.37%                 | 10.75%                     | 3.99%                | 40.90%                 |
| BoMAPK16.1       | 41.27%                 | 10.93%                     | 5.29%                | 42.50%                 |
| BoMAPK16.2       | 37.54%                 | 15.76%                     | 7.31%                | 39.40%                 |
| BoMAPK17.1       | 43.74%                 | 12.94%                     | 4.11%                | 39.22%                 |
| BoMAPK17.2       | 43.44%                 | 12.50%                     | 4.30%                | 39.75%                 |
| BoMAPK18.1       | 37.04%                 | 11.46%                     | 4.65%                | 46.84%                 |
| BoMAPK18.2       | 37.25%                 | 11.58%                     | 5.20%                | 45.97%                 |
| BoMAPK19.1       | 38.86%                 | 10.87%                     | 3.92%                | 46.35%                 |
| BoMAPK19.2       | 39.35%                 | 11.42%                     | 5.09%                | 44.14%                 |
| BoMAPK20.1       | 34.05%                 | 16.79%                     | 6.67%                | 42.50%                 |
| BoMAPK20.2       | 40.54%                 | 13.14%                     | 4.81%                | 41.51%                 |
