# Supplementary material
Source: MDPI journal article supplement (https://www.mdpi.com/2311-7524/9/10/1119)
Supplement: s1 [file s1 › Supplementary Table S5.pdf]

**Table S5.** The Ka/Ks value of segmental duplication gene pairs in cabbage

| Gene pairs                   | Ka          | Ks          | Ka/Ks       |
|------------------------------|-------------|-------------|-------------|
| <i>BoMAPK2/BoMAPK1</i>       | 0.065345207 | 0.857986718 | 0.076161094 |
| <i>BoMAPK6.2/BoMAPK6.1</i>   | 0.025550373 | 0.512965226 | 0.049809172 |
| <i>BoMAPK8.2/BoMAPK15</i>    | 0.111928007 | 0.808907473 | 0.138369357 |
| <i>BoMAPK8.2/BoMAPK8.1</i>   | 0.03885235  | 0.356228388 | 0.109065845 |
| <i>BoMAPK16.2/BoMAPK16.1</i> | 0.042623594 | 0.337474565 | 0.126301649 |
| <i>BoMAPK17.2/BoMAPK17.1</i> | 0.017540714 | 0.288372671 | 0.060826548 |
| <i>BoMAPK20.2/BoMAPK20.1</i> | 0.031080301 | 0.449822521 | 0.069094586 |
| <i>BoMAPK18.2/BoMAPK19.1</i> | 0.114659333 | 0.703146879 | 0.163065978 |
| <i>BoMAPK18.2/BoMAPK18.1</i> | 0.112259619 | 0.742909558 | 0.151108056 |
| <i>BoMAPK18.1/BoMAPK19.1</i> | 0.045305893 | 0.352802183 | 0.128417269 |
| <i>BoMAPK19.2/BoMAPK18.2</i> | 0.034848154 | 0.433648526 | 0.080360366 |
| <i>BoMAPK19.2/BoMAPK19.1</i> | 0.104906176 | 0.706684558 | 0.148448378 |
| <i>BoMAPK19.2/BoMAPK18.1</i> | 0.109052833 | 0.654146559 | 0.166710093 |
