# Supplementary material
Source: MDPI journal article supplement (https://www.mdpi.com/2311-7524/9/10/1119)
Supplement: s1 [file s1 › Supplementary Table S6-.pdf]

**Table S6.** The Ka/Ks value of collinearity gene pairs between cabbage and Arabidopsis

| <b>Gene pairs</b>          | <b>Ka</b>   | <b>Ks</b>   | <b>Ka/Ks</b> |
|----------------------------|-------------|-------------|--------------|
| <i>BoMAPK1/AtMAPK1</i>     | 0.024385139 | 0.511146594 | 0.047706743  |
| <i>BoMAPK1/AtMAPK2</i>     | 0.052179128 | 0.893327597 | 0.058409847  |
| <i>BoMAPK2/AtMAPK2</i>     | 0.028569215 | 0.395365739 | 0.072260219  |
| <i>BoMAPK2/AtMAPK1</i>     | 0.054115849 | 0.894746809 | 0.060481745  |
| <i>BoMAPK3/AtMAPK3</i>     | 0.027871574 | 0.498995024 | 0.055855414  |
| <i>BoMAPK4.1/AtMAPK4</i>   | 0.026009896 | 0.552232401 | 0.047099548  |
| <i>BoMAPK4.1/AtMAPK11</i>  | 0.065371922 | 0.899692686 | 0.072660279  |
| <i>BoMAPK4.1/AtMAPK12</i>  | 0.140539688 | 1.733813002 | 0.081058158  |
| <i>BoMAPK4.2/AtMAPK13</i>  | 0.039940868 | 0.43938661  | 0.090901422  |
| <i>BoMAPK5/AtMAPK5</i>     | 0.046007453 | 0.530917097 | 0.086656567  |
| <i>BoMAPK6.1/AtMAPK6</i>   | 0.021274052 | 0.747545879 | 0.028458523  |
| <i>BoMAPK6.1/AtMAPK10</i>  | 0.184528396 | 1.509155541 | 0.122272616  |
| <i>BoMAPK6.2/AtMAPK6</i>   | 0.026738467 | 0.627042875 | 0.042642167  |
| <i>BoMAPK6.2/AtMAPK10</i>  | 0.191496512 | 1.360173544 | 0.140788294  |
| <i>BoMAPK7/AtMAPK7</i>     | 0.016608033 | 0.757459989 | 0.021925955  |
| <i>BoMAPK7/AtMAPK14</i>    | 0.064280484 | 0.936504737 | 0.068638718  |
| <i>BoMAPK8.1/AtMAPK8</i>   | 0.042555517 | 0.443096205 | 0.096041258  |
| <i>BoMAPK8.2/AtMAPK8</i>   | 0.054023991 | 0.367541945 | 0.146987282  |
| <i>BoMAPK8.2/AtMAPK15</i>  | 0.091545585 | 0.813989087 | 0.112465371  |
| <i>BoMAPK9/AtMAPK9</i>     | 0.039991703 | 0.367691459 | 0.108764297  |
| <i>BoMAPK13/AtMAPK11</i>   | 0.141926299 | 1.394371998 | 0.101785104  |
| <i>BoMAPK13/AtMAPK12</i>   | 0.023856499 | 0.400506215 | 0.059565864  |
| <i>BoMAPK15/AtMAPK8</i>    | 0.093025832 | 0.684649322 | 0.135873693  |
| <i>BoMAPK15/AtMAPK15</i>   | 0.044323725 | 0.474420328 | 0.093427121  |
| <i>BoMAPK16.1/AtMAPK16</i> | 0.034462925 | 0.532110423 | 0.064766492  |
| <i>BoMAPK16.2/AtMAPK16</i> | 0.030983422 | 0.581552944 | 0.053277044  |
| <i>BoMAPK17.1/AtMAPK17</i> | 0.019409795 | 0.42246123  | 0.045944558  |
| <i>BoMAPK17.2/AtMAPK17</i> | 0.024462383 | 0.393855087 | 0.06211011   |
| <i>BoMAPK18.1/AtMAPK18</i> | 0.066267683 | 0.655975198 | 0.101021629  |
| <i>BoMAPK18.1/AtMAPK19</i> | 0.097735843 | 0.999503506 | 0.097784393  |
| <i>BoMAPK18.2/AtMAPK18</i> | 0.10461857  | 1.093316874 | 0.095689157  |
| <i>BoMAPK18.2/AtMAPK19</i> | 0.042945313 | 0.621918017 | 0.069053012  |
| <i>BoMAPK19.1/AtMAPK18</i> | 0.057957084 | 0.556277684 | 0.104187326  |
| <i>BoMAPK19.1/AtMAPK19</i> | 0.095501063 | 0.853066348 | 0.111950335  |
| <i>BoMAPK19.2/AtMAPK18</i> | 0.101935612 | 1.05017443  | 0.09706541   |
| <i>BoMAPK19.2/AtMAPK19</i> | 0.043003213 | 0.524666522 | 0.081962944  |
| <i>BoMAPK20.1/AtMAPK20</i> | 0.019364164 | 0.634873755 | 0.03050081   |
| <i>BoMAPK20.2/AtMAPK20</i> | 0.030685724 | 0.395558424 | 0.077575706  |
