# Supplementary material
Source: MDPI journal article supplement (https://www.mdpi.com/2311-7524/9/10/1119)
Supplement: s1 [file s1 › Supplementary Table S7.xlsx]

## Sheet: Sheet1
Table S7. The number of cis-acting elements in BoMAPKs promoter
Gene Id	Stress responsive cis-acting element						Hormone responsive cis-acting element									Developmental responsive cis-acting element
	W-box	MBS	TC-rich repeats	ARE	LTR	GC-motif	TCA-element	CGTCA-motif	TGACG-motif	P-box	GARE-motif	TATC-box	ABRE	TGA-element	AuxRR-core	CAT-box	O2-site	GCN4-motif	MBSI
BoMAPK1	1	3	1	2			1		2				1
BoMAPK2	2	2		2	3		1		1				1	1					1
BoMAPK3			2	3			1	2		1			5			1		1
BoMAPK4.1				2			1		1				4				2
BoMAPK4.2	3			4	2		1	3		3
BoMAPK5		1	2		2		1		1	1	1		4	1		1
BoMAPK6.1	2	1		5	1	2			1	1			5			1
BoMAPK6.2	1		1	4			1						2			1
BoMAPK7			2		3				1	2	1		7	1
BoMAPK8.1	1			1	2		1		3		1		3
BoMAPK8.2			1	4										1
BoMAPK9		1		4			1		1				6	1				1
BoMAPK13		1		1				2					1					1
BoMAPK15	3	1		1	1		1		3
BoMAPK16.1		1		2					3			1	1			1
BoMAPK16.2	1			2	2		1		1	1			3	1			2	1
BoMAPK17.1	1			1	1								1	3	1
BoMAPK17.2	2		1				2	2		3		1	3	4		1	2	1	1
BoMAPK18.1	1		4	5	1		2			2			2	1	2	1		1
BoMAPK18.2	1		1	4	1				3				3	1	1
BoMAPK19.1	1	3		1	1		3			1	1		3		1	1
BoMAPK19.2		1	1	1				1					1			2
BoMAPK20.1				2			1		2		1	1	5			1
BoMAPK20.2		2		2									2
	BoMAPK2	BoMAPK1
	BoMAPK19.2	BoMAPK2
	BoMAPK17.2	BoMAPK3
	BoMAPK16.2	BoMAPK4
	BoMAPK20.2	BoMAPK5
	BoMAPK6.2	BoMAPK6
	BoMAPK4.1	BoMAPK7
	BoMAPK3	BoMAPK8
	BoMAPK20.1	BoMAPK9
	BoMAPK6.1	BoMAPK10
	BoMAPK13	BoMAPK11
	BoMAPK1	BoMAPK12
	BoMAPK8.2	BoMAPK14
	BoMAPK9	BoMAPK15
	BoMAPK18.2	BoMAPK16
	BoMAPK18.1	BoMAPK17
	BoMAPK19.1	BoMAPK18
	BoMAPK15	BoMAPK19
	BoMAPK17.1	BoMAPK21
	BoMAPK8.1	BoMAPK22
	BoMAPK4.2	BoMAPK23
	BoMAPK7	BoMAPK24
	BoMAPK5	BoMAPK25
	BoMAPK16.1	BoMAPK26
