# Supplementary material
Source: MDPI journal article supplement (https://www.mdpi.com/2311-7524/9/10/1119)
Supplement: s1 [file s1 › Supplementary Table S8.xlsx]

## Sheet: Table S3
Table S8. Expression profiles of BoMAPK genes in different tissues
Gene name	Bud	Callus	Flower	Leaf	Root	Silique	Stem
BoMAPK17.2	3.02414	4.11953	3.08661	2.59488	5.87381	2.72026	3.56191
BoMAPK4.1	5.33133	5.6465	5.42821	5.02239	5.98738	5.46419	5.58553
BoMAPK3	4.99269	7.62255	5.02191	5.41054	8.44978	4.98448	7.26537
BoMAPK6.1	5.02414	4.22596	6.59049	4.70101	4.7629	5.07916	4.49229
BoMAPK18.1	1.65849	3.57099	2.63151	1.68079	2.97039	2.10118	2.04013
BoMAPK19.1	3.37224	4.27252	3.28715	2.74891	3.74215	2.39926	2.14758
BoMAPK8.1	4.38802	3.59921	4.59615	3.22772	3.94481	3.08438	3.71789
BoMAPK5	0.616725	1.75393	-0.785567	1.17727	-1.13305	1.27089	-0.61414
BoMAPK1	2.51677	1.25543	2.05613	1.58316	0.878568	1.78166	2.55128
BoMAPK9	1.20774	2.15619	0.162558	1.34824	1.3101	1.886	-0.0590259
BoMAPK19.2	1.65849	3.57099	2.63151	1.68079	2.97039	2.10118	2.04013
BoMAPK4.2	5.33133	5.6465	5.42821	5.02239	5.98738	5.46419	5.58553
