# Supplementary material
Source: MDPI journal article supplement (https://www.mdpi.com/2311-7524/9/10/1119)
Supplement: s1 [file s1 › Supplementary Table S9.xlsx]

## Sheet: Sheet1
Table S9. Expression analysis of BoMAPK genes under culbroot infection by RT-qPCR
Gene ID	F7CK	F7I	F21CK	F21I
BoMAPK1	1.00325	0.820571	0.678495	1.52116
BoMAPK2	1.00178	0.658197	1.14415	2.17849
BoMAPK3	1.00633	2.6321	1.42986	0.572932
BoMAPK4.1	1.00012	0.890369	1.18901	2.26836
BoMAPK4.2	1.03197	0.400694	0.69261	0.0220023
BoMAPK5	1.00147	0.589793	0.783771	0.967887
BoMAPK6.1	1.00431	0.905365	0.755924	1.78005
BoMAPK6.2	1.00618	0.763347	0.75519	1.51469
BoMAPK7	1.00944	0.627301	0.819201	1.21405
BoMAPK8.1	1.04226	0.265189	0.526135	0.0261157
BoMAPK8.2	1.01803	1.1264	0.85837	1.69245
BoMAPK9	1.01424	0.553052	1.10453	1.82866
BoMAPK13	1.00091	0.777407	0.769264	1.34642
BoMAPK15	1.01138	0.484439	0.837426	0.820879
BoMAPK16.1	1.00754	0.55073	1.18909	1.59398
BoMAPK17.1	1.02452	1.95365	2.04246	2.37325
BoMAPK17.2	1.00171	2.1713	3.66927	4.95478
BoMAPK18.1	1.0143	0.241299	0.664502	0.826628
BoMAPK18.2	1.00279	1.39854	1.94203	1.97505
BoMAPK19.1	1.02403	0.443267	0.539835	1.69131
BoMAPK19.2	1.00766	0.176406	0.703811	1.75633
BoMAPK20.1	1.02752	1.22831	0.825902	2.78205
BoMAPK20.2	1	0.653725	0.570104	2.78368
Note: The RNA expression level relatived to the actin gene was calculated using the 2–ΔΔCT method.
