# Supplementary material
Source: MDPI journal article supplement (https://www.mdpi.com/2311-7524/9/10/1119)
Supplement: s1 [file s1 › Supplementary Table S10.xlsx]

## Sheet: Sheet1
Table S10. Expression analysis of BoMAPK genes under salt and cold stress, as determined by RT-qPCR.
Gene ID	CK	NaCl-3h	NaCl-6h	NaCl-24h	Cold-6h	Cold-24h
BoMAPK1	0.0937224	0.918873	0.455173	0.264064	0.742209	0.0309867
BoMAPK2	0.0555947	0.154085	0.162371	0.201215	0.254417	0.0180242
BoMAPK3	0.0926006	0.0399954	0.224108	0.0732917	2.04716	0.0581462
BoMAPK4.1	0.262908	0.742895	0.335629	0.211311	0.804507	0.036657
MAPK4.2	0.627224	0.1616	0.622843	0.0704237	0.165433	0.00433366
CiMAPK5	0.0689096	0.294524	0.786447	0.131023	0.106618	0.111772
BoMAPK6.1	0.0391151	0.321524	0.636831	0.213166	0.296075	0.0676784
BoMAPK6.2	0.354392	0.0401637	0.565269	0.54321	1.31856	0.481073
BoMAPK7	0.259986	1.75851	1.96955	0.804163	0.81153	0.0244495
CiMAPK8.1	0.271397	0.0590907	0.00102376	0.326314	0.0720826	0.038211
MAPK8.2	0.264898	0.124095	0.0245269	0.0183405	0.098541	0.00138216
MAPK9	0.306866	0.288308	0.888064	0.245678	0.227373	0.0505006
BoMAPK13	0.232668	0.176865	0.544095	0.0473821	0.904505	0.515302
MAPK15	0.403206	4.08059	21.4177	12.1597	1.21959	0.295126
CiMAPK16.1	0.0669572	0.179802	0.16202	0.0544129	1.19168	0.263586
BoMAPK17.1	0.074641	0.169215	0.169773	0.0798093	0.017989	0.00622125
BoMAPK17.2	0.0879444	0.592464	0.534007	0.0219165	0.267829	0.0363549
MAPK18.1	0.165858	0.120663	0.166175	0.00597656	1.37882	0.71002
MAPK18.2	0.316522	0.0772699	0.0872747	0.0154957	0.233375	0.9789
MAPK19.1	0.595792	0.395728	1.00439	0.206962	2.72333	0.123573
BoMAPK19.2	0.0898056	0.19545	0.0631626	0.206103	0.551075	0.100006
BoMAPK20.1	0.180483	0.0563786	0.181409	0.173943	0.482735	0.190288
BoMAPK20.2	0.329653	0.122332	0.0994782	0.0319763	0.206236	0.00164873
Note: The RNA expression level relatived to the actin gene was calculated using the 2–ΔΔCT method.
