# Supplementary material
Source: MDPI journal article supplement (https://www.mdpi.com/2311-7524/9/10/1119)

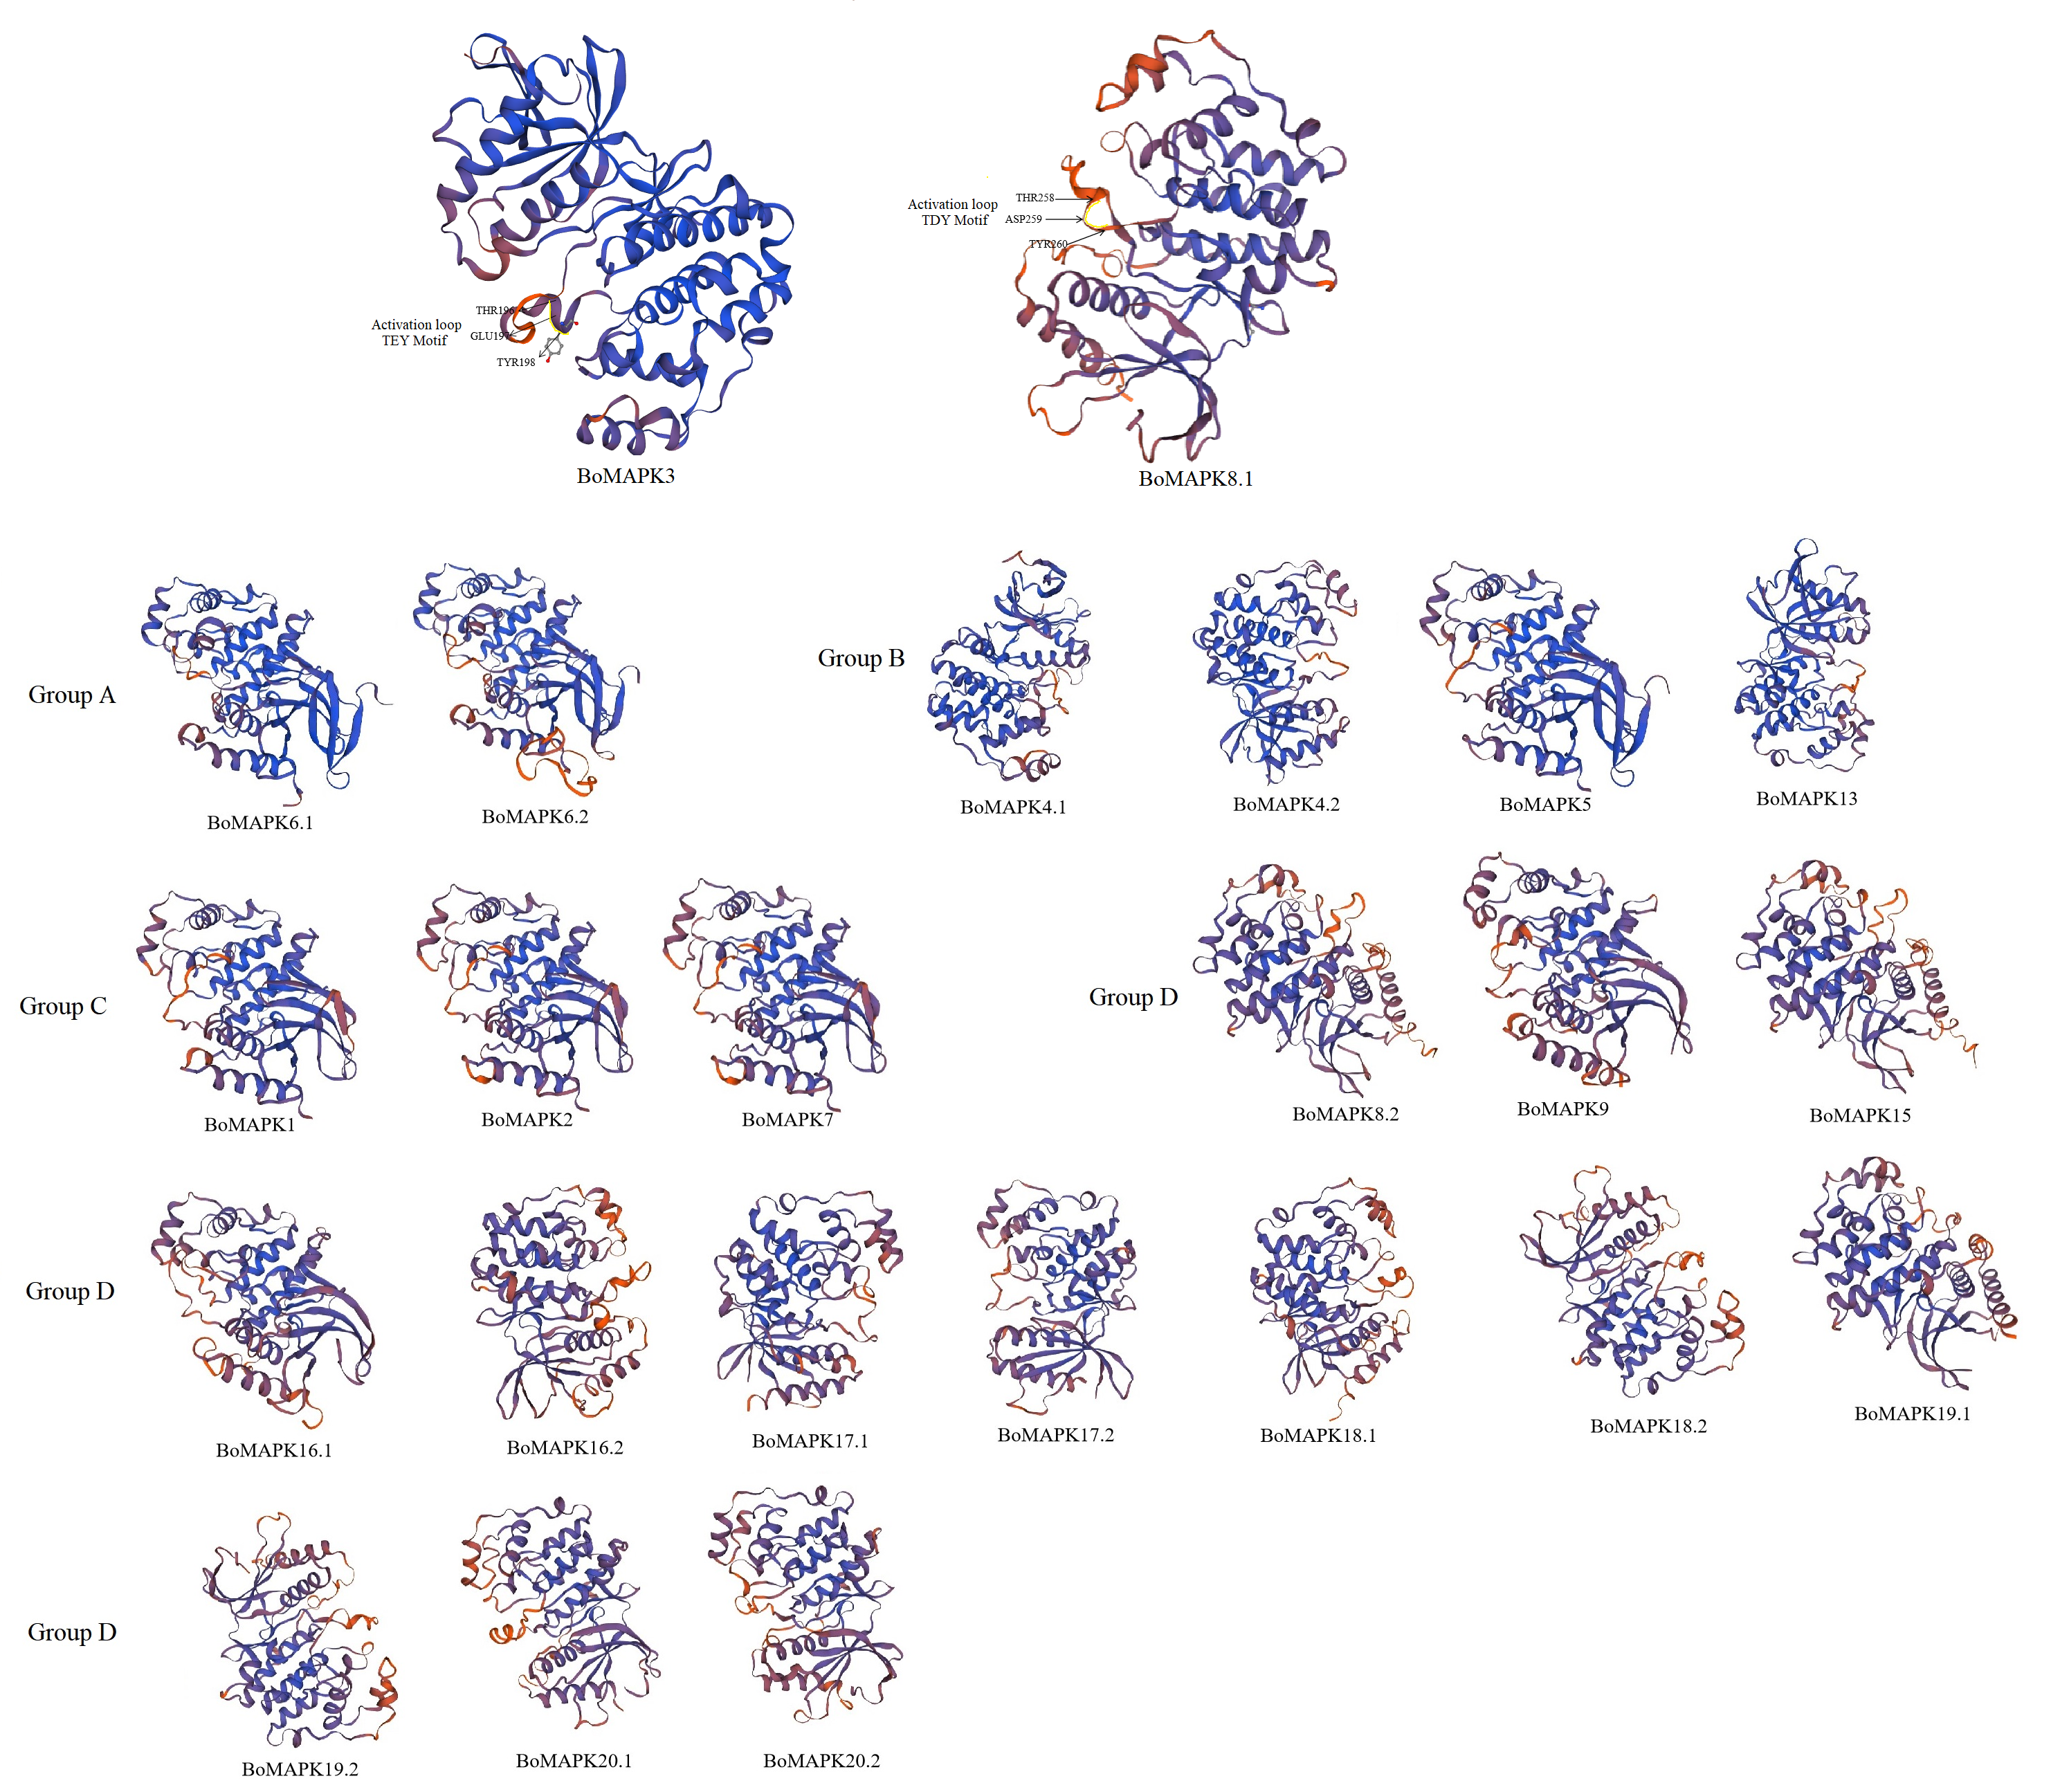

Supplement: s1 [file s1 › Supplementary Figure S1.png]

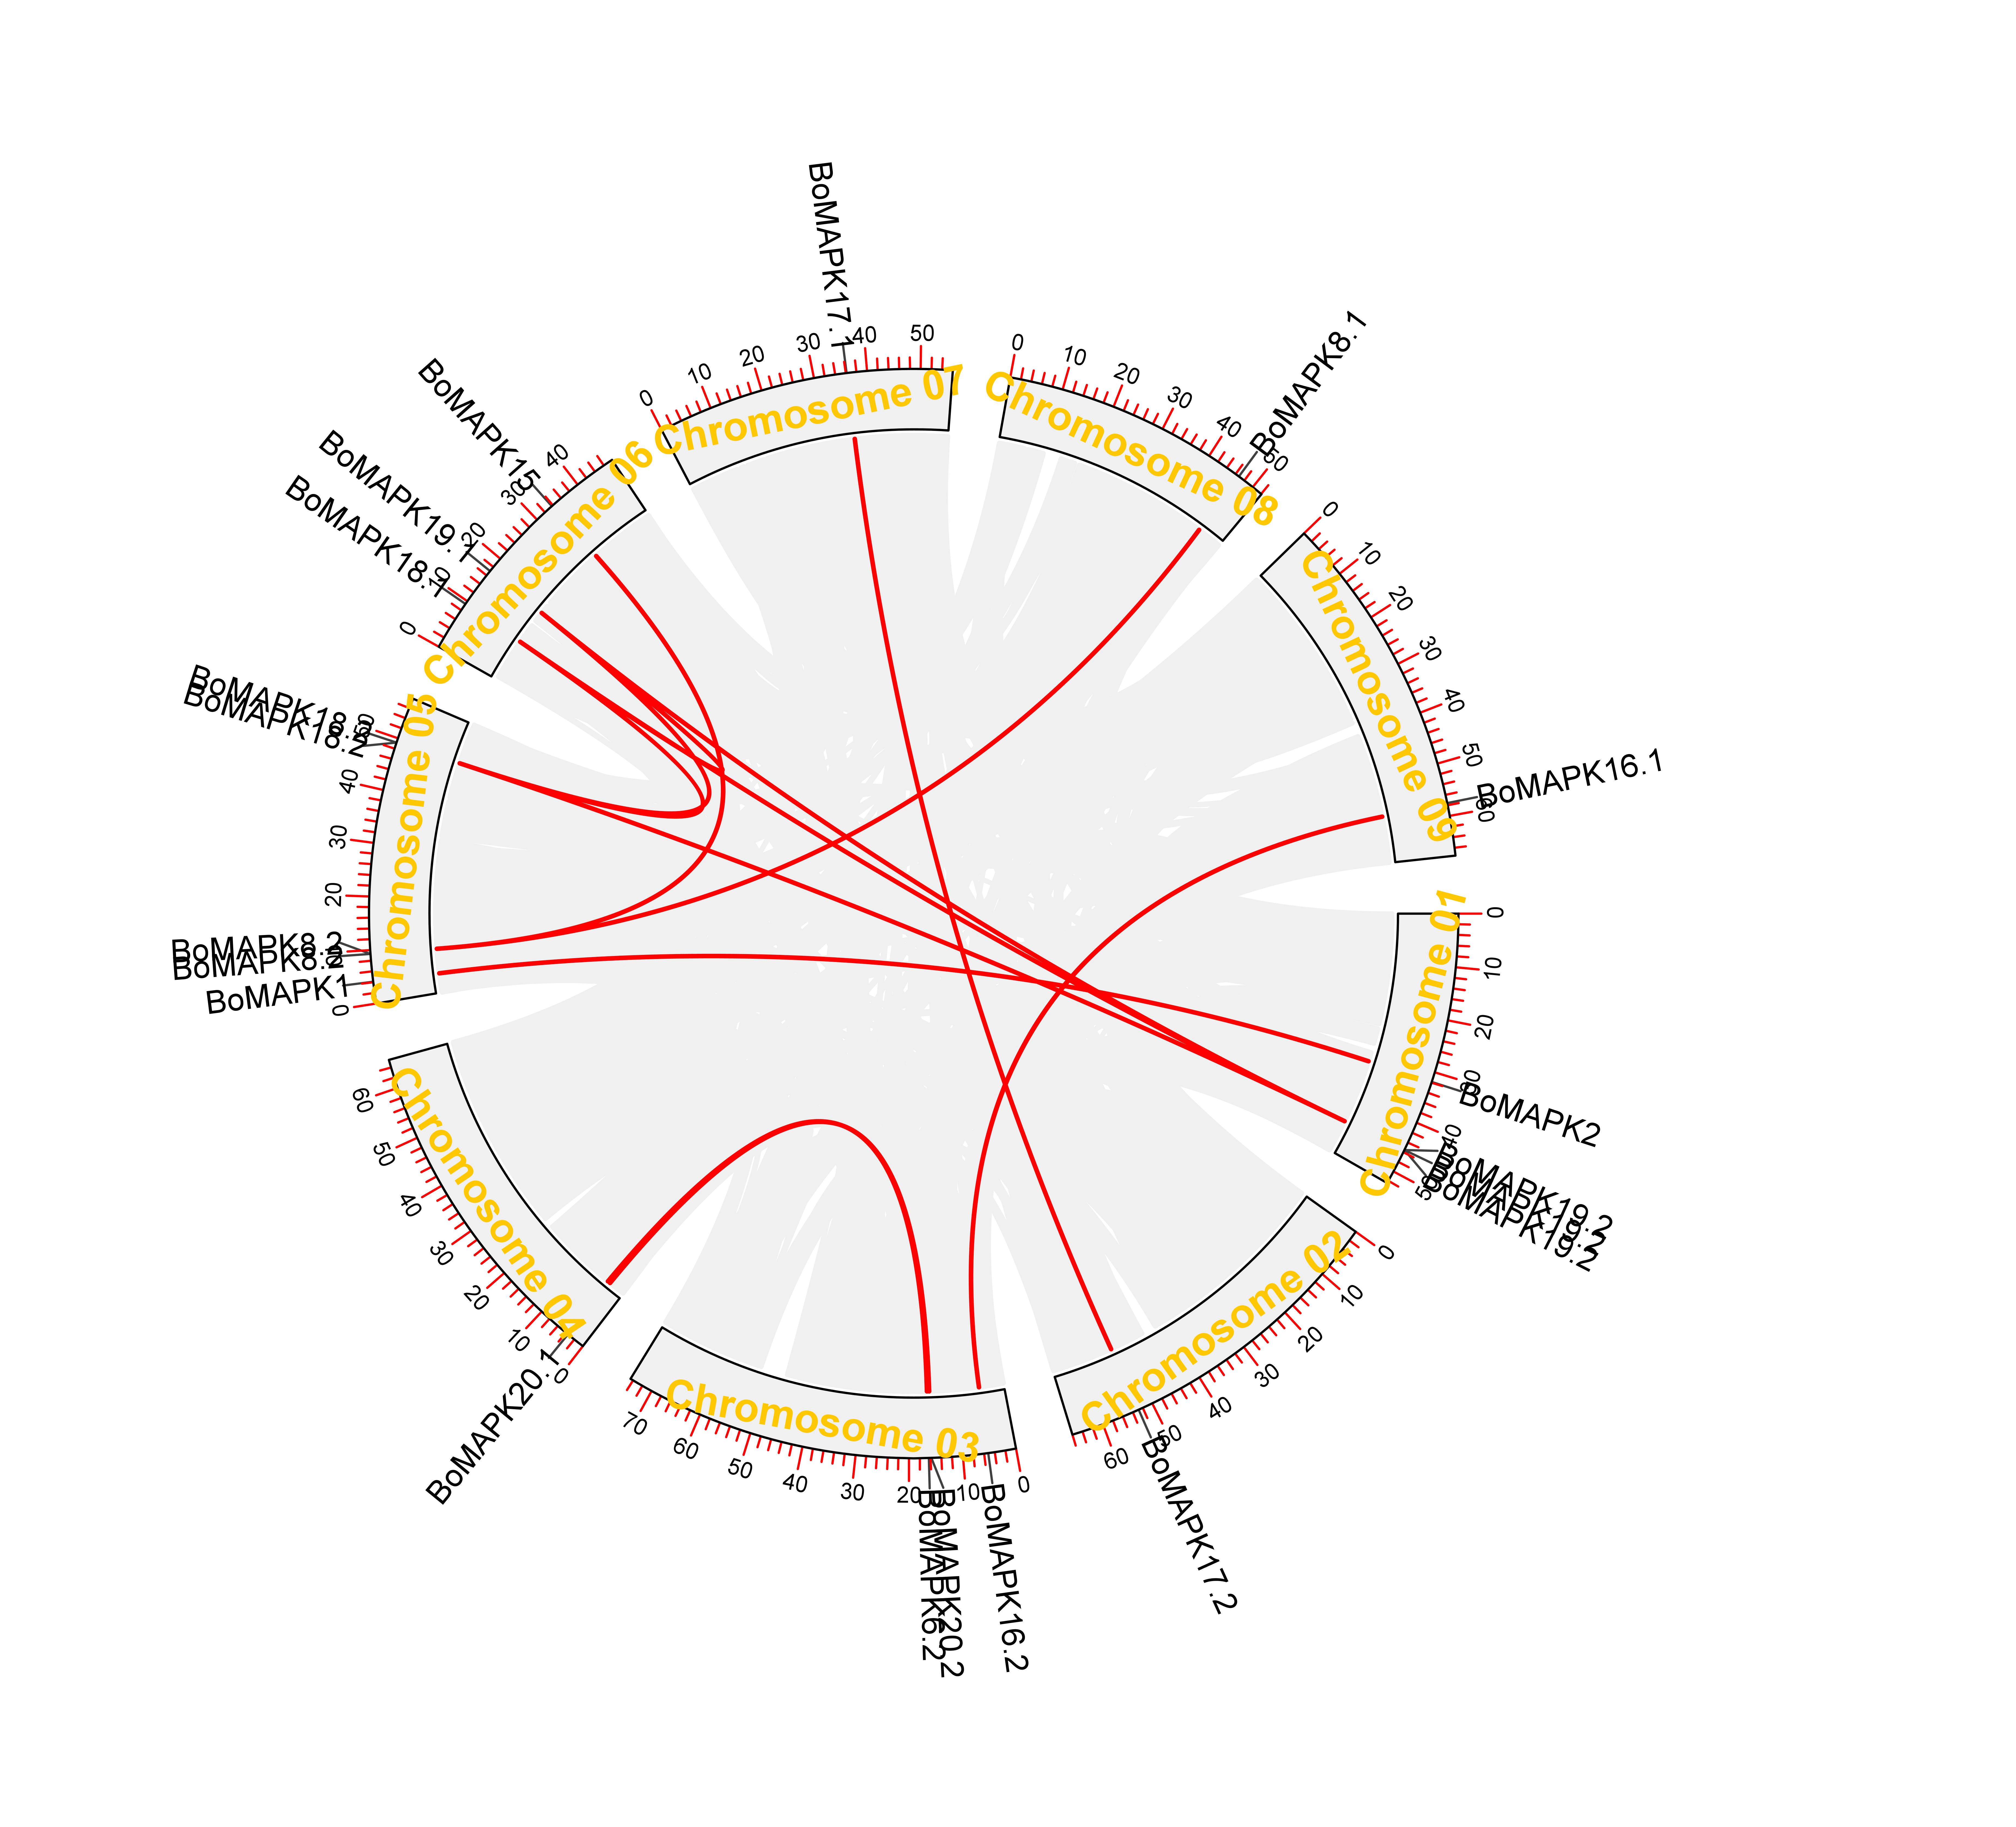

Supplement: s1 [file s1 › Supplementary Figure S2.jpg]

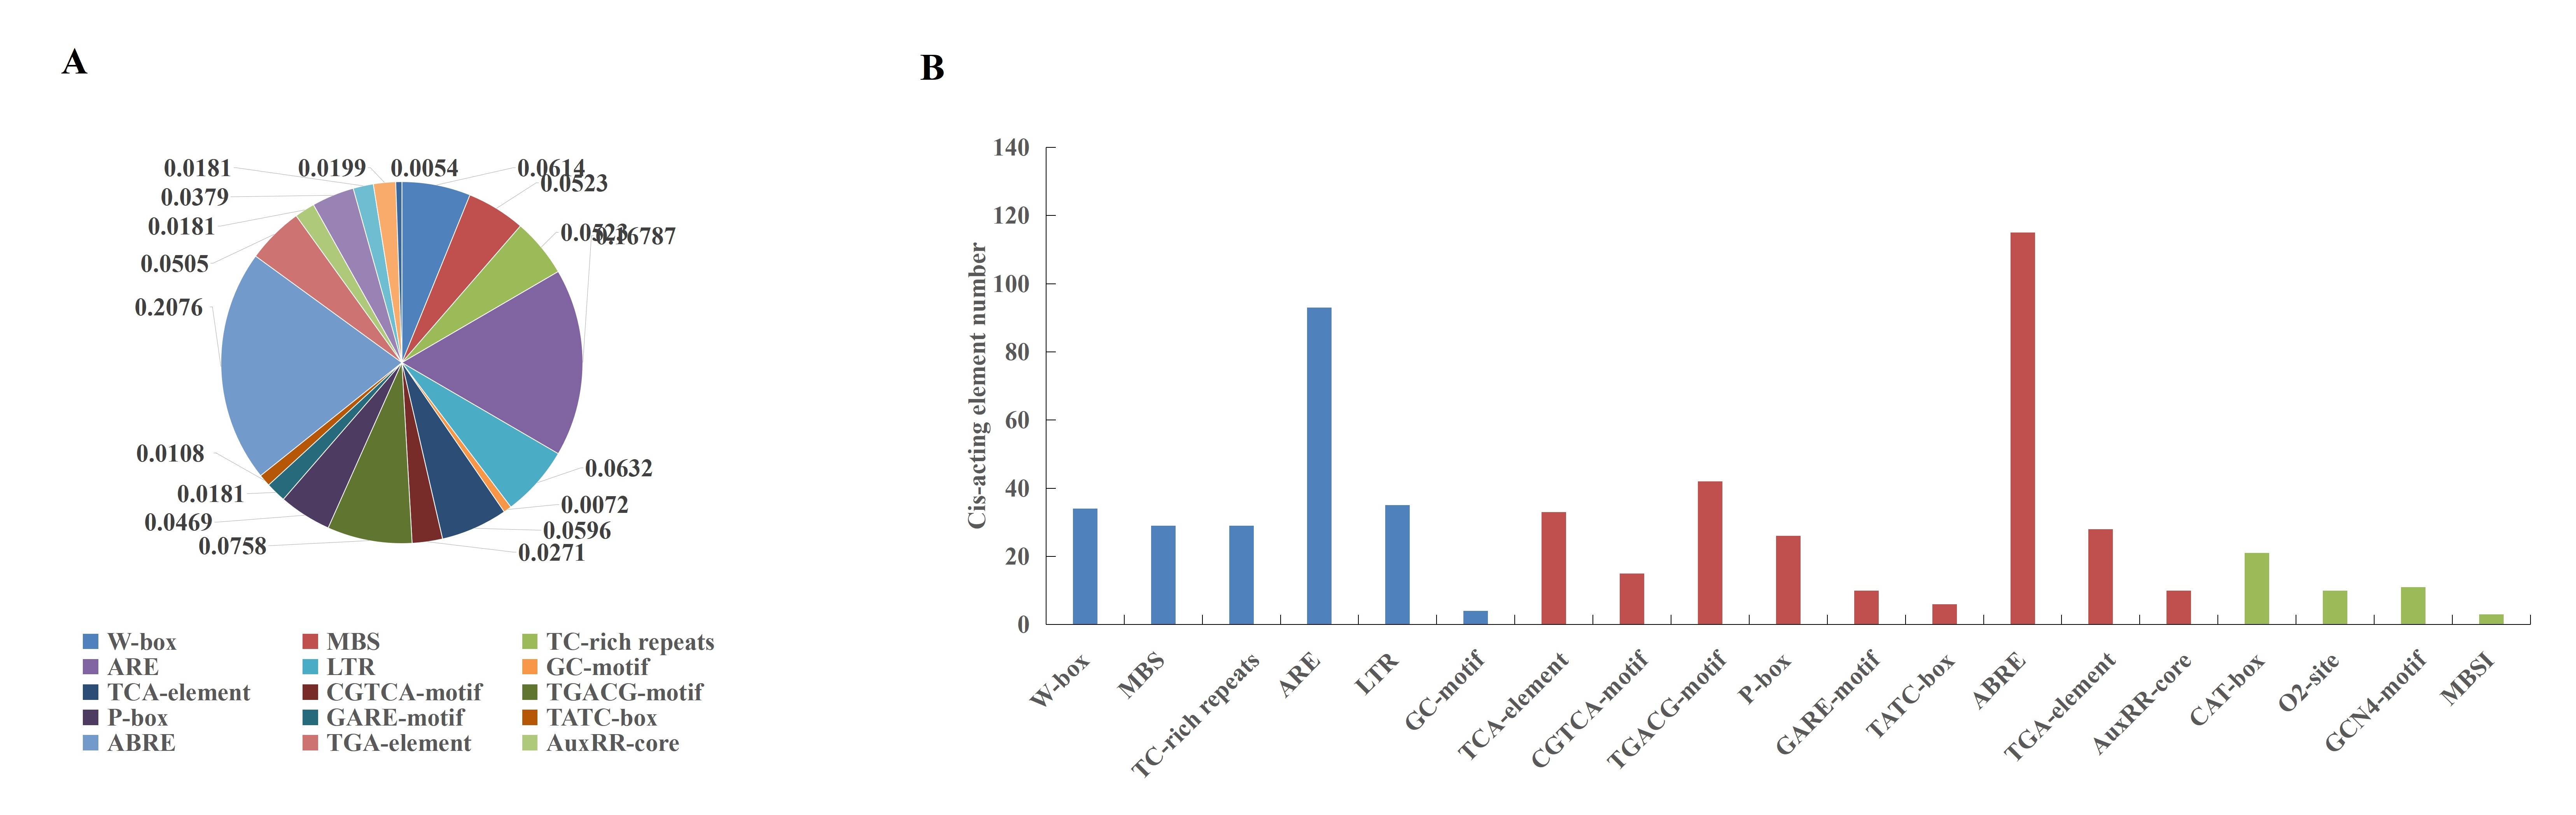

Supplement: s1 [file s1 › Supplementary Figure S3.jpg]

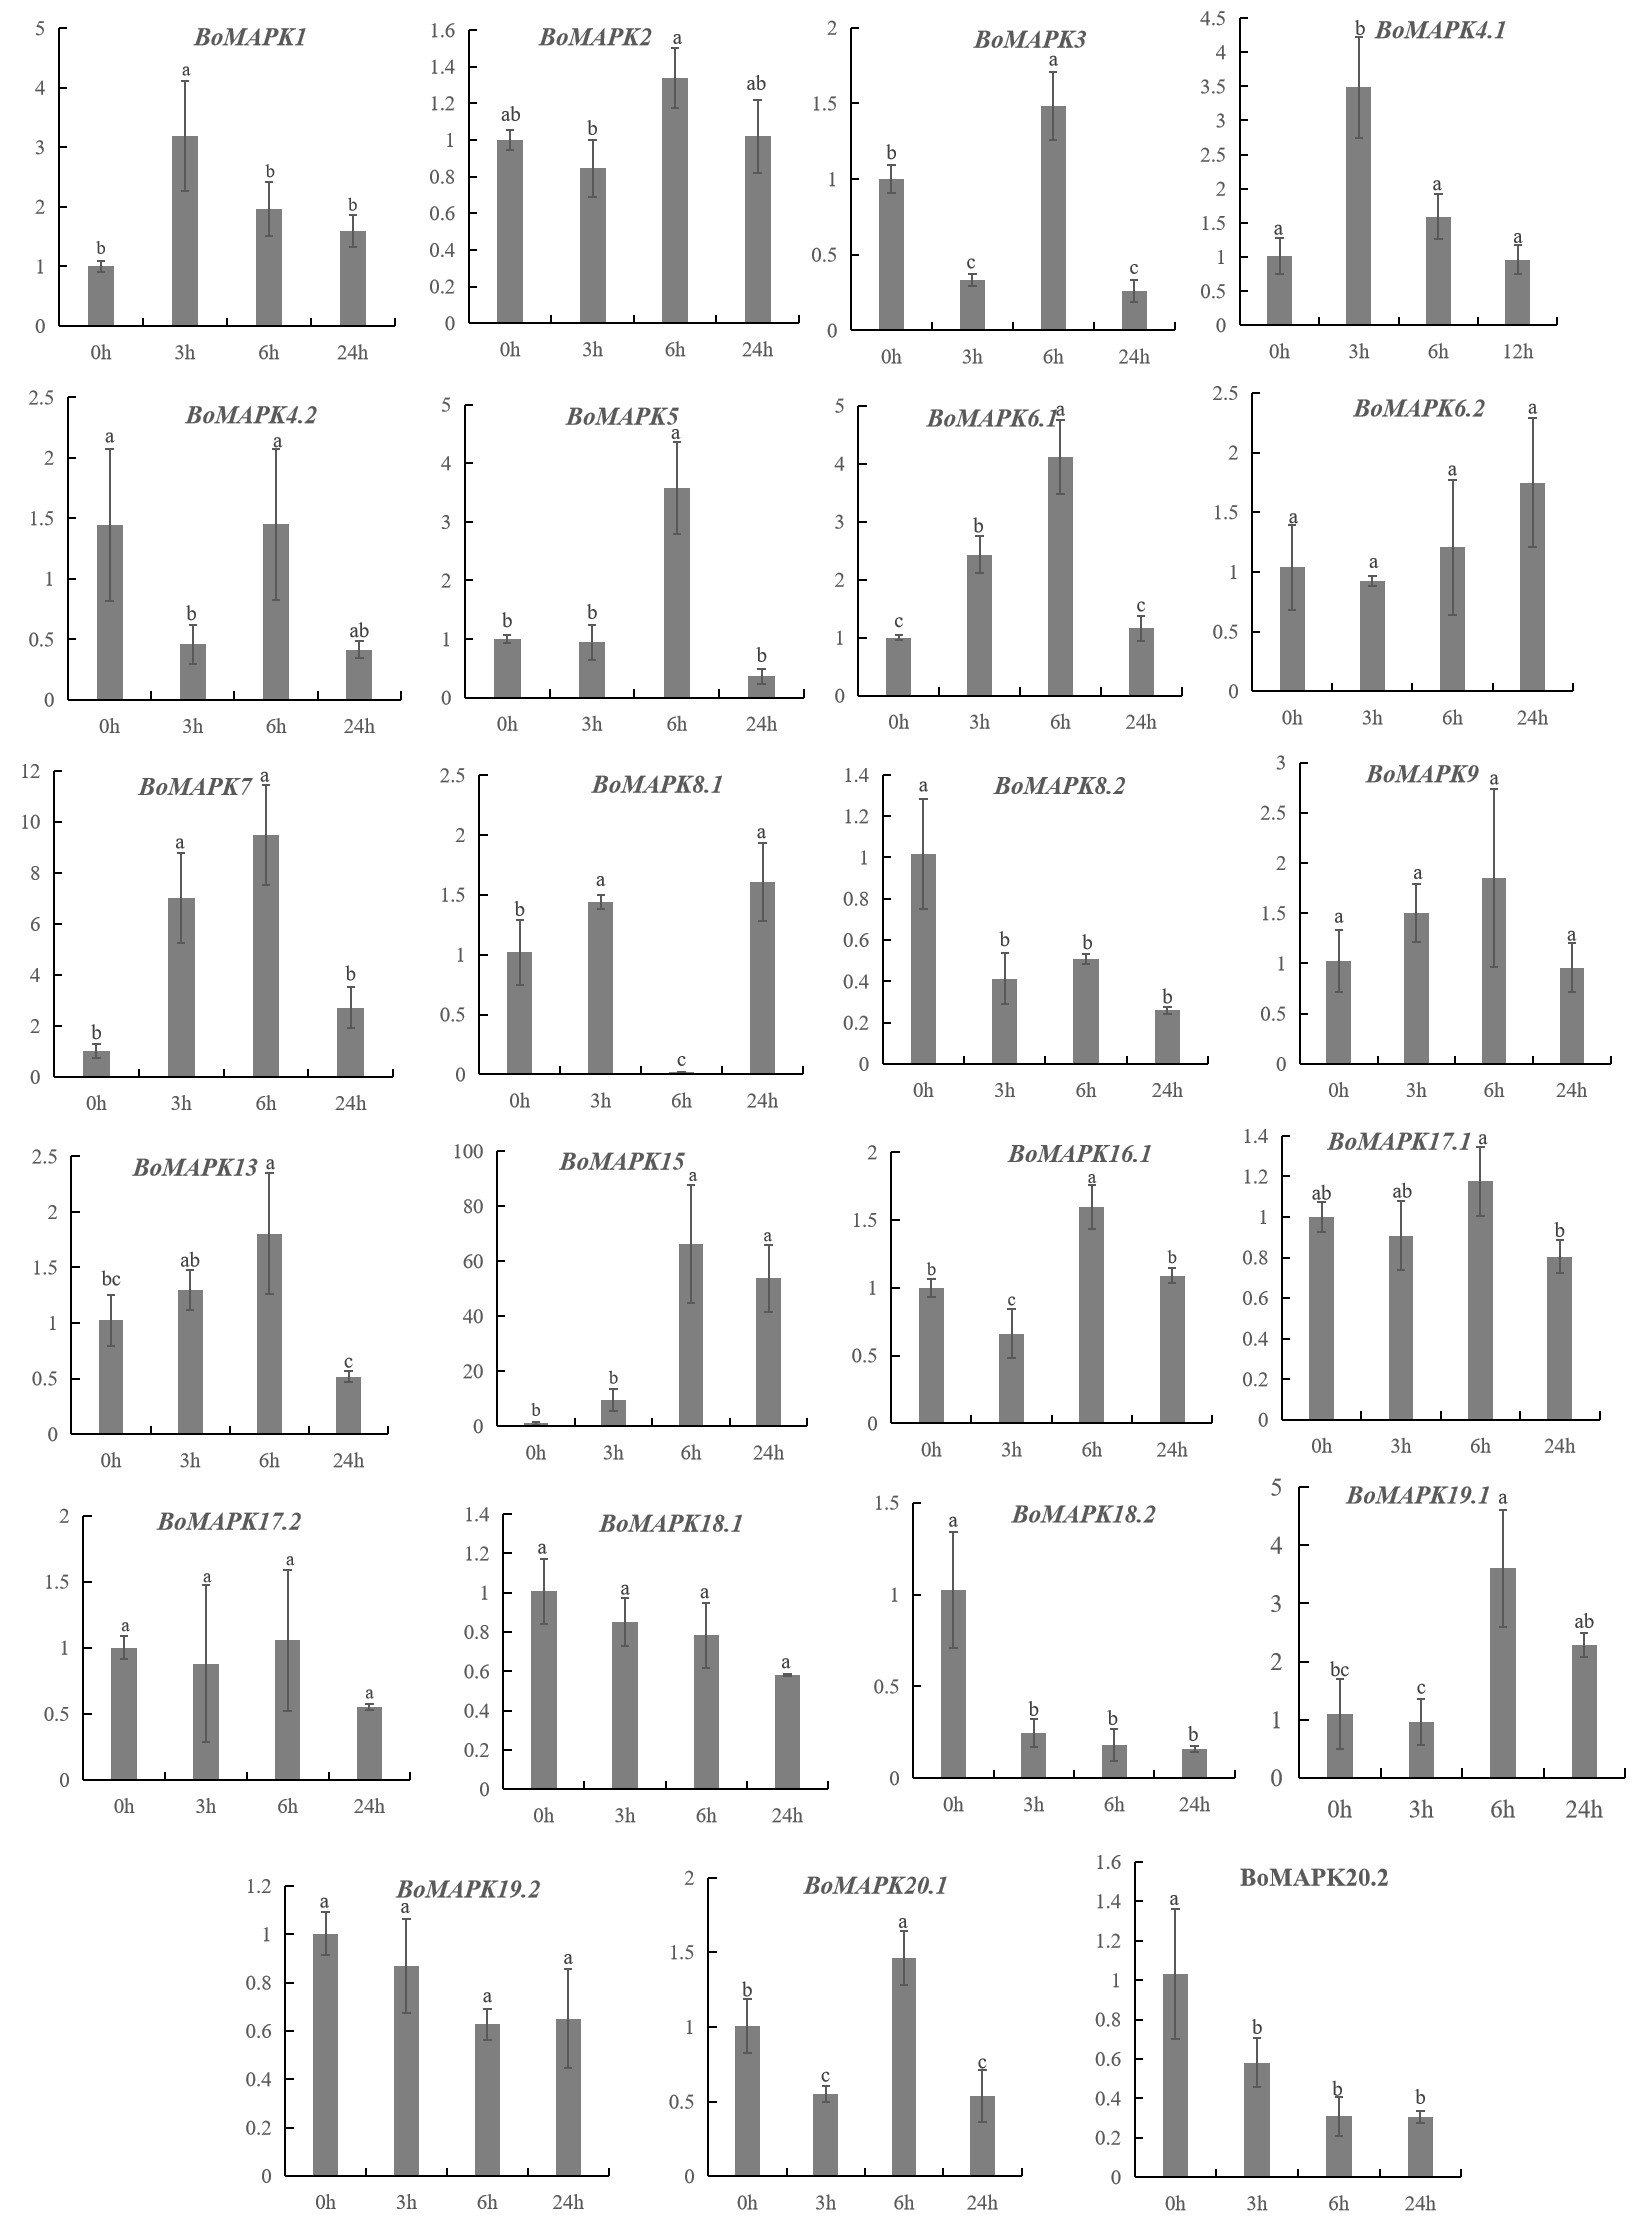

Supplement: s1 [file s1 › Supplementary Figure S4.jpg]

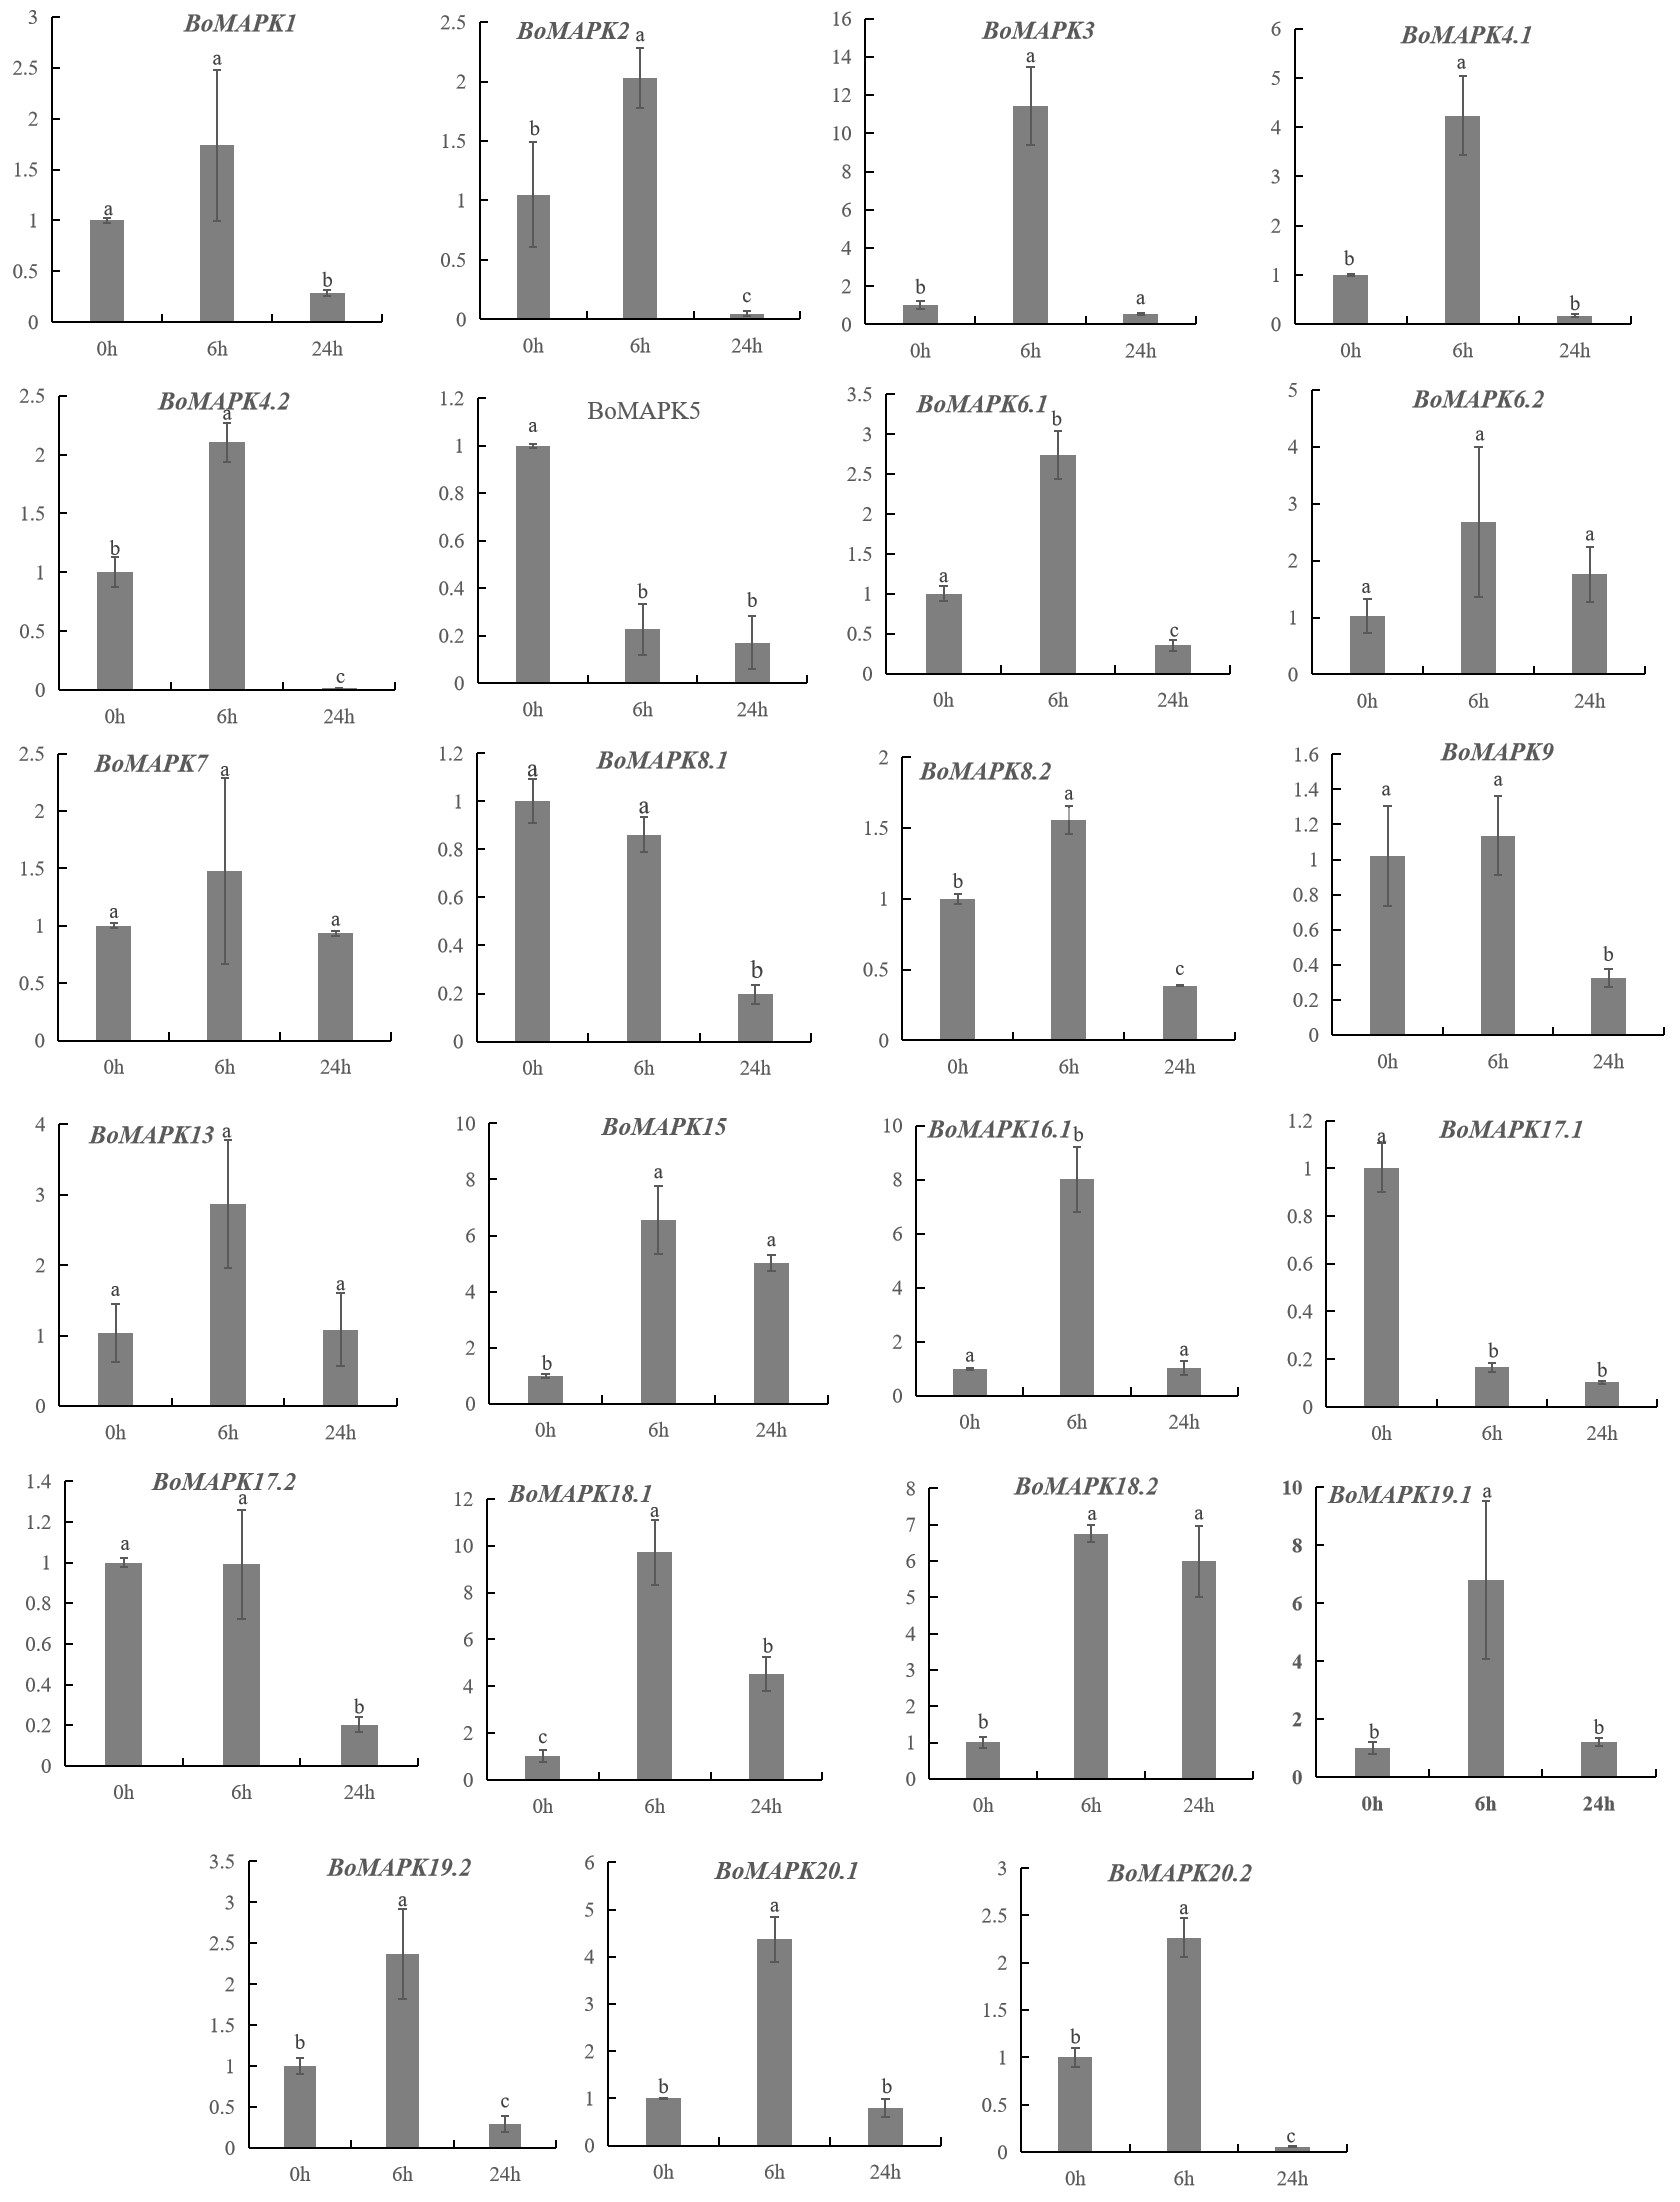

Supplement: s1 [file s1 › Supplementary Figure S5.jpg]
